# Supplementary material
Source: PubMed Central journal article supplement (PMC7301585)
Supplement: ao0c00983_si_001.pdf [file ao0c00983_si_001.pdf]

## **Supplementary Information**

### **Chemical activation of forage grass-derived biochar for treatment of aqueous antibiotic sulfamethoxazole**

Shengquan Zeng<sup>†</sup>, Eunsung Kan<sup>†,‡,\*</sup>

Affiliations:

<sup>†</sup>Department of Biological and Agricultural Engineering & Texas A&M AgriLife Research Center, Texas A&M University, TX 76401, USA

<sup>‡</sup>Department of Wildlife, Sustainability, and Ecosystem Sciences, Tarleton State University, TX 76401, USA.

**\* Corresponding author. Tel.: +1-254-968-4144; fax: +1-254-968-3759.**

**E-mail address: Eunsung.Kan@ag.tamu.edu**

## Characterization of biochars

Elemental compositions of all BCs were evaluated by an elemental analyzer (PerkinElmer 2400 series II, MA, USA) (Robert Microlit Lab, NJ, USA). According to ASTM standard D7582-10<sup>1</sup>, the proximate analysis was used to evaluate the contents of fixed carbon, volatile carbon and ash in BCs. Brunauer-Emmett-Teller (BET) surface area was evaluated with an apparatus at 77 K based on the measurements relating to N<sub>2</sub> sorption (Particle Technology Lab, Downers Grove, USA). Functional groups in BCs were evaluated by FT-IR spectra, which were recorded between 400 and 4000 cm<sup>-1</sup> using a FT-IR spectrometer (Bruker Optik GmbH, Ettlingen, Germany). To evaluate the crystallographic structures at the surface of BCs, an X-ray diffractometer (MiniFlex II, DE, USA) was used to assess the X-ray diffraction (XRD) patterns of BCs operating at 30 kV and 15 mA with a step size of 0.02° (2θ). The pH of zero point charges (pH<sub>PZC</sub>) of BCs were determined as described by the previous study<sup>2</sup>. Briefly, 0.01 g BC was added into 50 mL of NaCl solution (0.01 M), the initial pH of which was adjusted ranged from 3.0 to 10.0 using 0.1 M HCl or NaOH solution. After 2-day incubation at 20 °C and 150 rpm, the pH<sub>PZC</sub> of BCs were obtained based on the ΔpH (final – initial pH) = 0.

## Data analysis

In this study, the determination coefficients (R<sup>2</sup>) and the sum of squared error (SSE) were used to determine which model best fit the experimental data:

$$R^2 = 1 - \frac{\sum(Q_{exp} - Q_{cal})^2}{\sum(Q_{exp} - Q_{mean})^2} \quad (1)$$

$$SSE = \sqrt{\frac{\sum(Q_{exp} - Q_{cal})^2}{N}} \quad (2)$$

where Q<sub>exp</sub>, Q<sub>cal</sub> and Q<sub>mean</sub> are the experimental value, calculated value and mean of experimental value, respectively, and N is the number of measurements.

Table S1. Maximum adsorption capacity ( $Q_m$ ) of various adsorbents for sulfamethoxazole

| Adsorbents                          | Surface area<br>(m <sup>2</sup> /g) | $Q_m$<br>(mg/g)     | Reference     |
|-------------------------------------|-------------------------------------|---------------------|---------------|
| Carbon nanotubes                    | 382                                 | 71.8 <sup>a</sup>   | 3             |
| Graphene Oxide                      | -                                   | 240 <sup>a</sup>    | 4             |
| Bamboo BC                           | 1.12                                | 88.1 <sup>a</sup>   | 5             |
| Alfalfa BC                          | 405                                 | 90.4 <sup>a</sup>   | 6             |
| Commercial AC<br>(ChemViron Carbon) | 848                                 | 118 <sup>a</sup>    | 7             |
| Pine Sawdust BC                     | 125                                 | 13.8 <sup>a</sup>   | 8             |
| Digested bagasse BC                 | 17.66                               | 54.38 <sup>a</sup>  | 9             |
| R-BC                                | 1.67                                | 23.56 <sup>b</sup>  | In this study |
| BC800                               | 85.82                               | 26.68 <sup>b</sup>  | In this study |
| A-BC                                | 1999.59                             | 456.11 <sup>b</sup> | In this study |
| Commercial AC (Calgon F400)         | 816.3 <sup>11</sup>                 | 312.14 <sup>b</sup> | 10            |
| Commercial AC (Darco® G-60)         | 933 <sup>12</sup>                   | 328.83 <sup>b</sup> | 10            |
| Commercial AC (Norit® GAC)          | 1200 <sup>13</sup>                  | 377.5 <sup>b</sup>  | 10            |

BC: Biochar

AC: Activated Carbon

R-BC: Raw biochar produced at 300 °C (in this study)

BC800: Biochar produced at 800 °C (in this study)

A-BC: Activated biochar (in this study)

<sup>a</sup>Derived from isotherm model

<sup>b</sup>Derived from experimental data

Table S2. Characteristics of various activated carbons.

| Adsorbents                                                                  | Surface area<br>(m <sup>2</sup> /g) | Elemental compositions |      |       |      | O/C  | H/C  | Ash (%) | Reference |
|-----------------------------------------------------------------------------|-------------------------------------|------------------------|------|-------|------|------|------|---------|-----------|
|                                                                             |                                     | C                      | H    | O     | N    |      |      |         |           |
| A-BC (This study)                                                           | 1991.6                              | 81.22                  | 0.84 | 7.42  | 0.83 | 0.07 | 0.12 | 9.46    |           |
| Commercial activated carbon (Calgon F400)                                   | 1102                                | 82.85                  | 0.93 | 9.27  | 0.55 | 0.08 | 0.13 | 5.40    | 14        |
| Commercial activated carbon (Alphacarbo)                                    | 525.3                               | 78.62                  | 1.28 | 19.77 | 0.33 | 0.19 | 0.20 | 5.03    | 15        |
| Commercial activated carbon (Steam activated coconut shell)                 | 1138                                | 90.1                   | 0.2  | 9.0   | -    | 0.07 | 0.03 | 0.4     | 16        |
| Commercial activated carbon (H <sub>3</sub> PO <sub>4</sub> activated wood) | 1515                                | 64.8                   | 2.4  | 19.5  | -    | 0.23 | 0.44 | 1.1     | 16        |
| Activated carbon (K <sub>2</sub> CO <sub>3</sub> activated tobacco residue) | 1634                                | 55.25                  | 0.22 | 45.38 | 0.95 | 0.62 | 0.05 | -       | 17        |
| Activated carbon (KOH activated tobacco residue)                            | 1474                                | 49.40                  | 0.28 | 48.80 | 1.52 | 0.74 | 0.07 | -       | 17        |
| Activated carbon (Steam activated beet pulp)                                | 821                                 | 77.9                   | 0.9  | 7.0   | 0.6  | 0.07 | 0.14 | 13.6    | 16        |
| Activated carbon (Steam activated peanut shell)                             | 829                                 | 91.2                   | 0.8  | 6.0   | 0.2  | 0.05 | 0.11 | 1.3     | 16        |

Table S3. Physicochemical characteristics of sulfamethoxazole (SMX) <sup>10, 18</sup>.

| Molecular structure                                                               | Formula                                                         | Molecular weight | Solubility <sup>a</sup> | pK <sub>a</sub>                                |
|-----------------------------------------------------------------------------------|-----------------------------------------------------------------|------------------|-------------------------|------------------------------------------------|
| 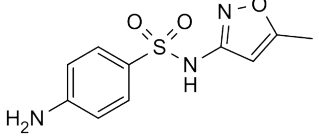 | C <sub>10</sub> H <sub>11</sub> N <sub>3</sub> O <sub>3</sub> S | 253.28           | 0.37 g/L                | pK <sub>1</sub> = 1.6<br>pK <sub>2</sub> = 5.7 |

<sup>a</sup> At ambient temperature

Table S4. Calculated sorption coefficients for three SMX species on A-BC at pH 1-12.

| <b>pH</b> | <b>K<sub>d</sub></b> | <b>K<sub>d</sub><sup>+</sup></b> | <b>K<sub>d</sub><sup>0</sup></b> | <b>K<sub>d</sub><sup>-</sup></b> |
|-----------|----------------------|----------------------------------|----------------------------------|----------------------------------|
| <b>1</b>  | 6402                 | 7357                             | 2597                             | 1000                             |
| <b>2</b>  | 7762                 | 4237                             | 9167                             | 1002                             |
| <b>3</b>  | 8229                 | 1294                             | 8519                             | 1016                             |
| <b>4</b>  | 8139                 | 1025                             | 8306                             | 1148                             |
| <b>5</b>  | 7145                 | 998                              | 8090                             | 2423                             |
| <b>6</b>  | 6199                 | 995                              | 4105                             | 7248                             |
| <b>7</b>  | 5478                 | 994                              | 1232                             | 5690                             |
| <b>8</b>  | 5356                 | 992                              | 1020                             | 5378                             |
| <b>9</b>  | 5561                 | 992                              | 1000                             | 5563                             |
| <b>10</b> | 2934                 | 991                              | 997                              | 2934                             |

Table S5. Contribution of different SMX species to the overall sorption on A-BC.

| pH | Contribution percent (%) |                  |                  |
|----|--------------------------|------------------|------------------|
|    | SMX <sup>+</sup>         | SMX <sup>0</sup> | SMX <sup>-</sup> |
| 1  | 91.86                    | 8.14             | <0.01            |
| 2  | 15.54                    | 84.46            | <0.01            |
| 3  | 0.60                     | 99.38            | 0.02             |
| 4  | 0.05                     | 99.68            | 0.28             |
| 5  | <0.01                    | 94.35            | 5.64             |
| 6  | <0.01                    | 22.11            | 77.89            |
| 7  | <0.01                    | 1.07             | 98.93            |
| 8  | <0.01                    | 0.10             | 99.90            |
| 9  | <0.01                    | <0.01            | 99.99            |
| 10 | <0.01                    | <0.01            | 99.99            |

\*Contribution percentage was calculated by  $K_d^+ \alpha^+ / K_d$  for SMX<sup>+</sup>,  $K_d^0 \alpha^0 / K_d$  for SMX<sup>0</sup>, and  $K_d^- \alpha^- / K_d$  for SMX<sup>-</sup>.

Table S6. Characteristics of lagoon wastewater from dairy farm (Stephenville, TX, USA).

---

|                |      |
|----------------|------|
| COD (ppm)      | 1050 |
| Total N (ppm)  | 460  |
| Total P (ppm)  | 57   |
| Total K (ppm)  | 676  |
| Total Ca (ppm) | 227  |
| Total Mg (ppm) | 157  |
| Total Na (ppm) | 277  |

---



Table S7. Adsorption isotherm, kinetic, and thermodynamic models used in this study.

| Models         | Names and Equations                                                                                                                                   |
|----------------|-------------------------------------------------------------------------------------------------------------------------------------------------------|
| Kinetics       | Pseudo-first order: $Q_t = Q_e(1 - \exp(-K_1t))$                                                                                                      |
|                | Pseudo-second order: $Q_t = \frac{K_2Q_e^2t}{1 + K_2Q_e t}$                                                                                           |
|                | Elovich: $Q_t = \left(\frac{1}{b}\right)\ln ab + \left(\frac{1}{b}\right)\ln t, t_0 = \frac{1}{ab}$                                                   |
|                | Intra-particle diffusion: $Q_t = K_i\sqrt{t} + C_i$                                                                                                   |
|                | Film diffusion(Boyd equation): $B_t = -\ln\left(1 - \frac{Q_t}{Q_e}\right) - 0.4977$                                                                  |
| Isotherm       | Freundlich isotherm: $Q_e = K_f C_e^{\frac{1}{n_f}}$                                                                                                  |
|                | Langmuir isotherm: $Q_e = \frac{Q_m K_L C_e}{1 + K_L C_e}, R_L = \frac{1}{1 + K_L C_0}$                                                               |
|                | Temkin isotherm: $Q_e = \frac{RT}{b_T} \ln(K_T C_e)$                                                                                                  |
|                | Dubinin-Radushkevich: $Q_e = K_{DR} \exp(-B_D \varepsilon_D^2) \quad \varepsilon_D = RT \ln\left(1 + \frac{1}{C_e}\right); E = \frac{1}{\sqrt{2B_D}}$ |
| Thermodynamics | $K_d = \frac{Q_e}{C_e}$                                                                                                                               |
|                | $\Delta G^o = -RT \ln(K_d)$<br>$\ln(K_d) = -\frac{\Delta G^o}{RT} = \frac{\Delta S^o}{R} - \frac{\Delta H^o}{RT}$                                     |

$Q_t$ : adsorption capacity (mg g<sup>-1</sup>) at time t (min).

$Q_e$ : adsorption capacity (mg g<sup>-1</sup>) at equilibrium time.

$K_1$ : adsorption rate constant of Pseudo-first order (min<sup>-1</sup>).

$K_2$ : adsorption rate constant of Pseudo-second order (min<sup>-1</sup>).

a: initial adsorption rate (mg/g.min).

b: desorption constant (g/mg).

$K_i$ : Intra-particle diffusion rate constant (mg min<sup>0.5</sup> g<sup>-1</sup>).

$C_i$ : the intercept reflecting the boundary layer thickness.

$B_t$ : Boyd constant, predicting the adsorption rate-limiting step.

$C_e$ : equilibrium concentration at liquid phase (mg L<sup>-1</sup>).

$K_f$ : distribution coefficient (mg/g), it implies that the energy of adsorption on a homogeneous surface is independent of surface coverage.

$1/n_f$ : related to the surface heterogeneity, more close to zero means more heterogeneous surface.

$Q_m$ : maximum adsorption capacity (mg/g) from monolayer adsorption.

$K_L$ : Langmuir constant (L/g) describing the adsorption/desorption equilibrium for each reactant in

contact with a surface.

$R_L$ : separation constant; the adsorption is irreversible  $R_L=0$ , favorable  $0 < R_L < 1$ , linear  $R_L=1$ , and unfavorable  $R_L > 1$ .

$R$ : universal gas constant ( $8.314 \text{ J mol}^{-1}\text{K}^{-1}$ ).

$T$ : temperature in terms of Kelvin.

$b_T$ : Temkin constant (J/mol), defined as variation of adsorption energy; the adsorption is exothermic ( $b_T > 1$ ) or endothermic ( $b_T < 1$ )

$K_T$ : equilibrium bond constant related to the maximum energy of bond (mg/L).

$K_{DR}$ : adsorption capacity (mg/g), multilayer adsorption

$B_D$ : mean free energy of sorption ( $\text{mol}^2/\text{kJ}^2$ ).

$E$ : bonding energy of the ion-exchange mechanism (kJ/mol).

$\epsilon_D$ : adsorption potential.

$\Delta H^\circ$  = standard enthalpy change.

$\Delta S^\circ$  = standard entropy change.

$\Delta G^\circ$  = standard Gibbs free energy change.

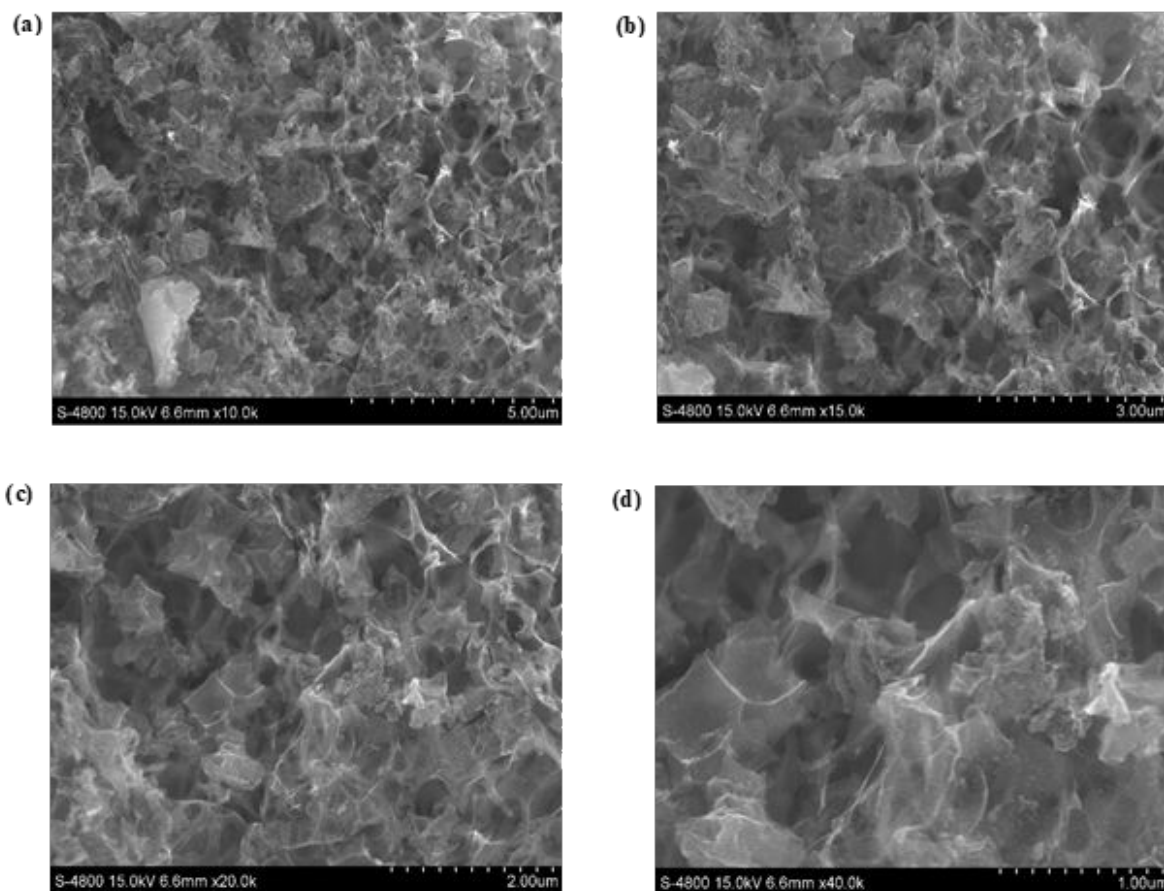

Figure S1. SEM images of A-BC at various magnifications (a:10,000; b:15,000; c:20,000; d:40,000)

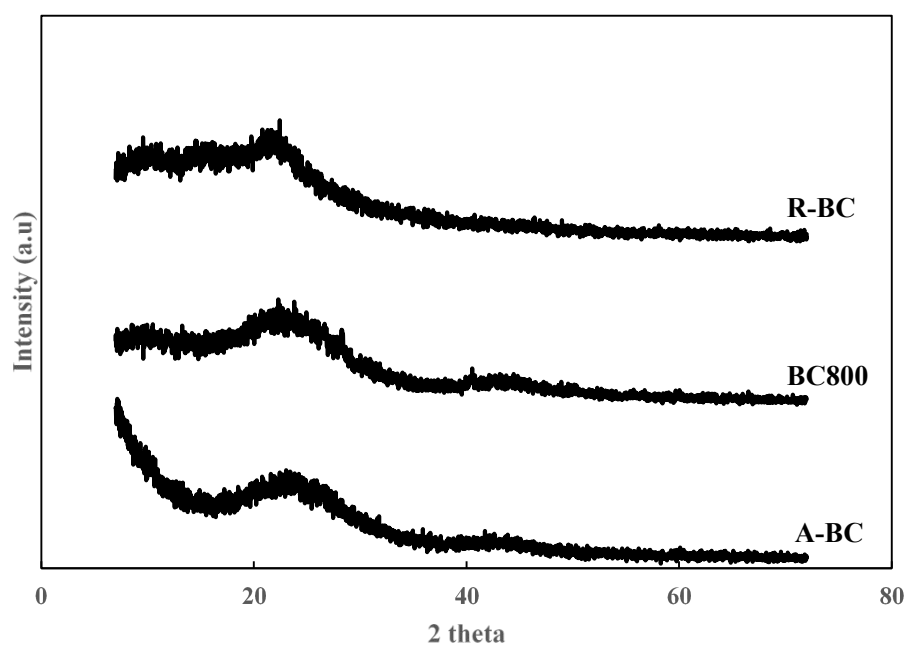

Figure S2. XRD pattern of all BCs.

R-BC: Raw biochar produced at 300 °C

BC800: Biochar produced at 800 °C

A-BC: Activated biochar

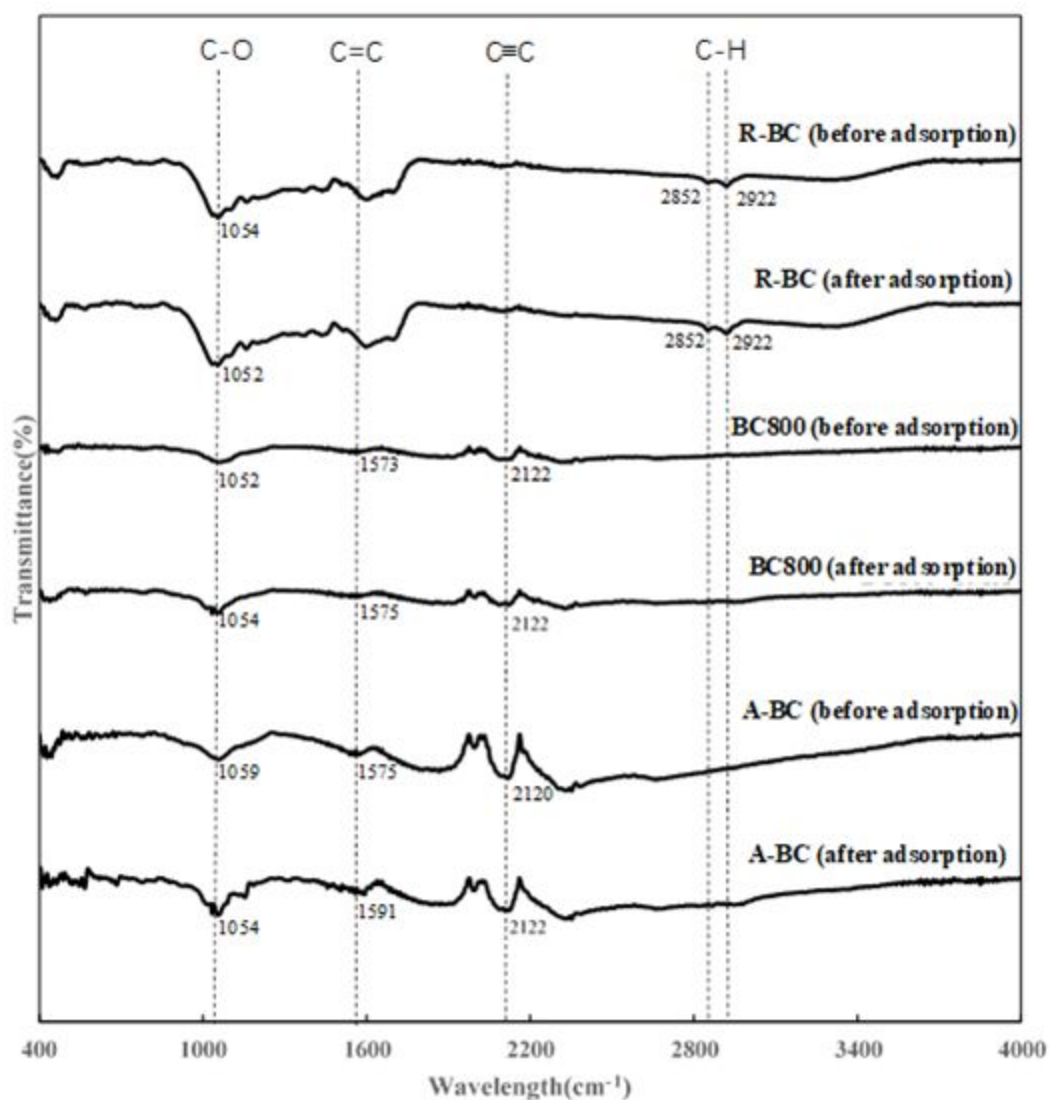

Figure S3. FT-IR spectrum of all BCs before and after SMX adsorption.

R-BC: Raw biochar produced at 300 °C

BC800: Biochar produced at 800 °C

A-BC: Activated biochar

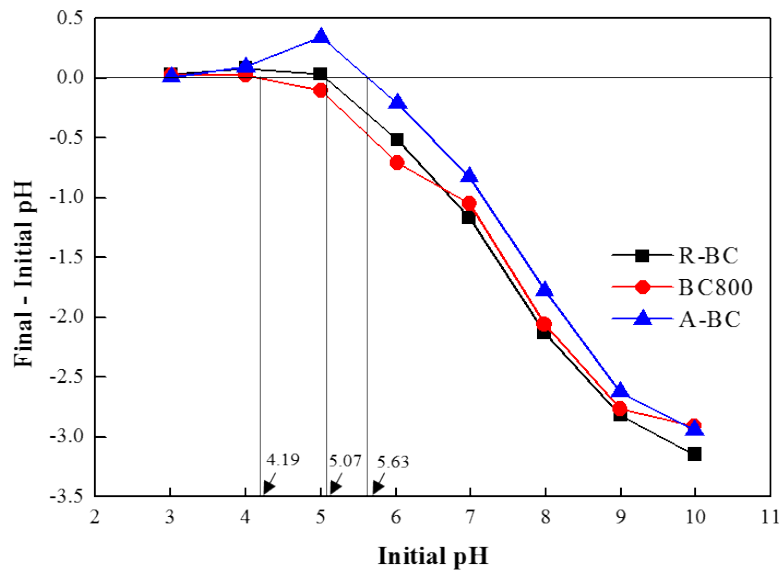

Figure S4. The  $pH_{pzc}$  of all BCs.  
 R-BC: Raw biochar produced at 300 °C  
 BC800: Biochar produced at 800 °C  
 A-BC: Activated biochar

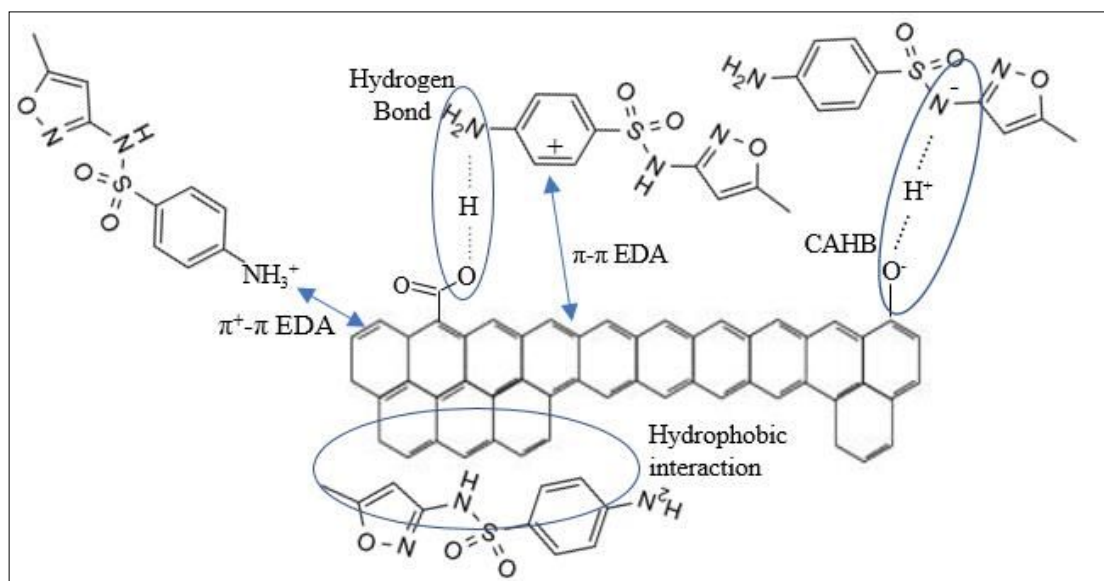

Figure S5. Proposed mechanisms for SMX adsorption on A-BC.

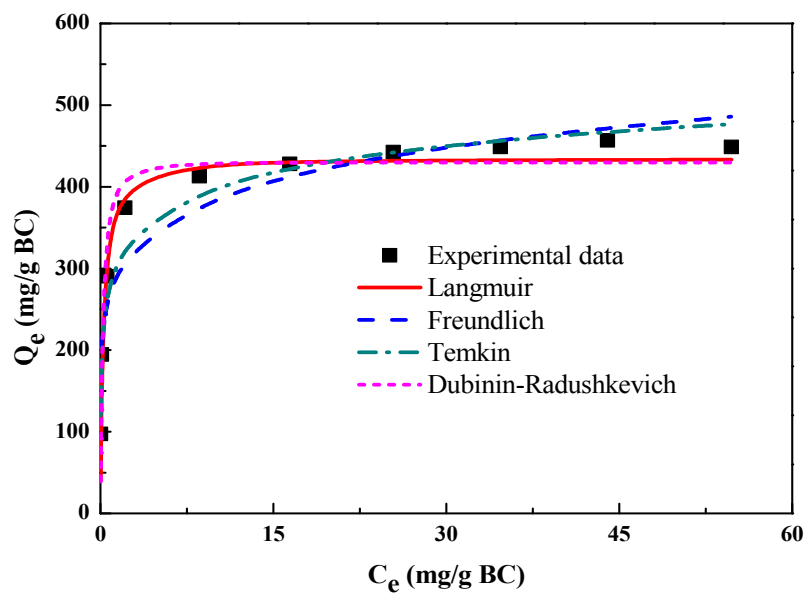

Figure S6. Adsorption isotherm of SMX on A-BC.



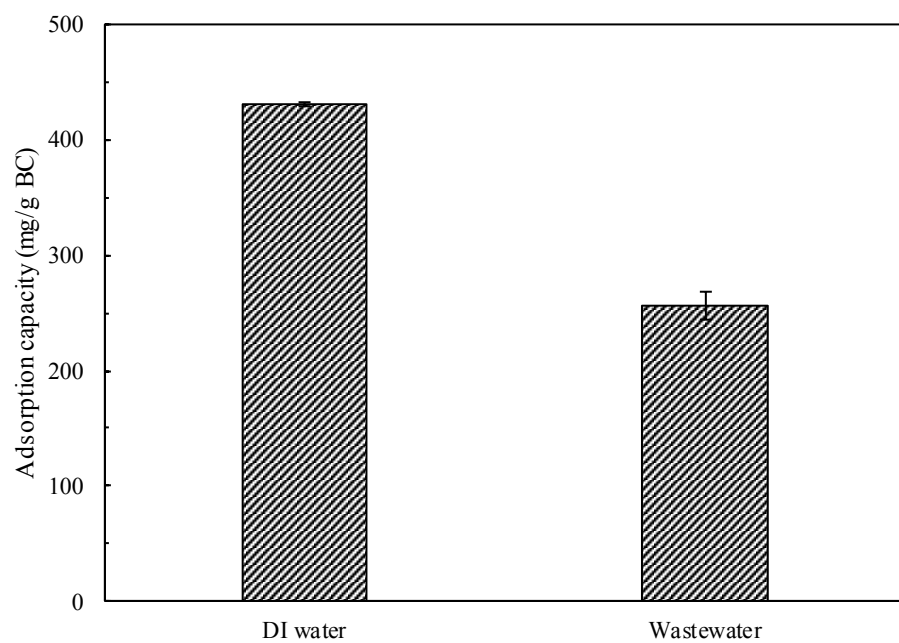

Figure S7. Adsorption of SMX onto A-BC in DI water and real wastewater. Adsorption conditions: 0.01 g of A-BC, initial pH of 6, 100 mL of 100 mg/L SMX, and 3 day.

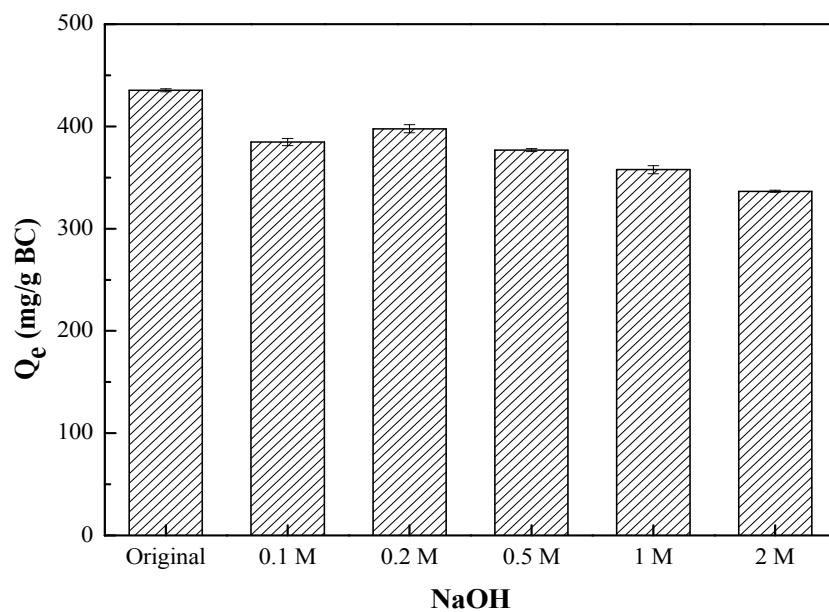

Figure S8. Effect of different NaOH concentration on the regeneration of A-BC.

## References

- (1) ASTM, A., D7582–10. Standard Test Methods for Proximate Analysis of Coal and Coke by Macro Thermogravimetric Analysis. *Annual Book of ASTM Standards*. American Society for Testing and Materials, West Conshohocken, PA **2010**.
- (2) Jang, H. M.; Yoo, S.; Choi, Y. K.; Park, S.; Kan, E. Adsorption isotherm, kinetic modeling and mechanism of tetracycline on Pinus taeda-derived activated biochar. *Bioresour. Technol.* **2018**, *259*, 24-31.
- (3) Zhao, H.; Liu, X.; Cao, Z.; Zhan, Y.; Shi, X.; Yang, Y.; Zhou, J.; Xu, J. Adsorption behavior and mechanism of chloramphenicols, sulfonamides, and non-antibiotic pharmaceuticals on multi-walled carbon nanotubes. *J. Hazard. Mater.* **2016**, *310*, 235-245.
- (4) Chen, H.; Gao, B.; Li, H. Removal of sulfamethoxazole and ciprofloxacin from aqueous solutions by graphene oxide. *J. Hazard. Mater.* **2015**, *282*, 201-207.
- (5) Ahmed, M. B.; Zhou, J. L.; Ngo, H. H.; Guo, W.; Johir, M. A. H.; Sornalingam, K. Single and competitive sorption properties and mechanism of functionalized biochar for removing sulfonamide antibiotics from water. *Chem. Eng. J.* **2017**, *311*, 348-358.
- (6) Choi, Y. K.; Kan, E. Effects of pyrolysis temperature on the physicochemical properties of alfalfa-derived biochar for the adsorption of bisphenol A and sulfamethoxazole in water. *Chemosphere* **2019**, *218*, 741-748.
- (7) Calisto, V.; Ferreira, C. I.; Oliveira, J. A.; Otero, M.; Esteves, V. I. Adsorptive removal of pharmaceuticals from water by commercial and waste-based carbons. *J. Environ. Manage.* **2015**, *152*, 83-90.
- (8) Reguyal, F.; Sarmah, A. K.; Gao, W. Synthesis of magnetic biochar from pine sawdust via oxidative hydrolysis of FeCl<sub>2</sub> for the removal sulfamethoxazole from aqueous solution. *J. Hazard. Mater.* **2017**, *321*, 868-878.
- (9) Yao, Y.; Zhang, Y.; Gao, B.; Chen, R.; Wu, F. Removal of sulfamethoxazole (SMX) and sulfapyridine (SPY) from aqueous solutions by biochars derived from anaerobically digested bagasse. *Environ. Sci. Pollut. Res.* **2018**, *25* (26), 25659-25667.
- (10) Jang, H. M.; Yoo, S.; Park, S.; Kan, E. Engineered biochar from pine wood: Characterization and potential application for removal of sulfamethoxazole in water. *Environ. Eng. Res.* **2018**, *24* (4), 608-617.
- (11) Gauden, P. A.; Szmechtig-Gauden, E.; Rychlicki, G.; Duber, S.; Garbacz, J. K.; Buczkowski, R. Changes of the porous structure of activated carbons applied in a filter bed pilot operation. *J. Colloid Interface Sci.* **2006**, *295* (2), 327-347.
- (12) Oliveira, L. C.; Rios, R. V.; Fabris, J. D.; Garg, V.; Sapag, K.; Lago, R. M. Activated carbon/iron oxide magnetic composites for the adsorption of contaminants in water. *Carbon* **2002**, *40* (12), 2177-2183.
- (13) Gicheva, G.; Yordanov, G. Removal of citrate-coated silver nanoparticles from aqueous dispersions by using activated carbon. *Colloid. Surface. A* **2013**, *431*, 51-59.
- (14) Jang, H. M.; Kan, E. A novel hay-derived biochar for removal of tetracyclines in water. *Bioresour. Technol.* **2019**, *274*, 162-172.
- (15) Pego, M. F.; Bianchi, M. L.; Carvalho, J. A.; Veiga, T. R. Surface modification of activated carbon by corona treatment. *An. Acad. Bras. Ciênc.* **2019**, *91* (1).
- (16) Torres-Pérez, J.; Gérente, C.; Andrès, Y. Sustainable activated carbons from agricultural residues dedicated to antibiotic removal by adsorption. *Chin. J. Chem. Eng.* **2012**, *20* (3), 524-529.
- (17) Kilic, M.; Apaydin-Varol, E.; Pütün, A. E. Adsorptive removal of phenol from aqueous solutions on activated carbon prepared from tobacco residues: equilibrium, kinetics and thermodynamics. *J. Hazard. Mater.* **2011**, *189* (1-2), 397-403.
- (18) Martínez, F.; Gómez, A. Estimation of the solubility of sulfonamides in aqueous media from partition

coefficients and entropies of fusion. *Phys. Chem. Liq.* **2002**, *40* (4), 411-420.
